# Supplementary material for: Gene Expression Profiling of Pancreas Neuroendocrine Tumors with Different Ki67-Based Grades
Source: MDPI journal article supplement (doi:10.3390/cancers13092054), 2021-04-23
Supplement: s1 [file s1]

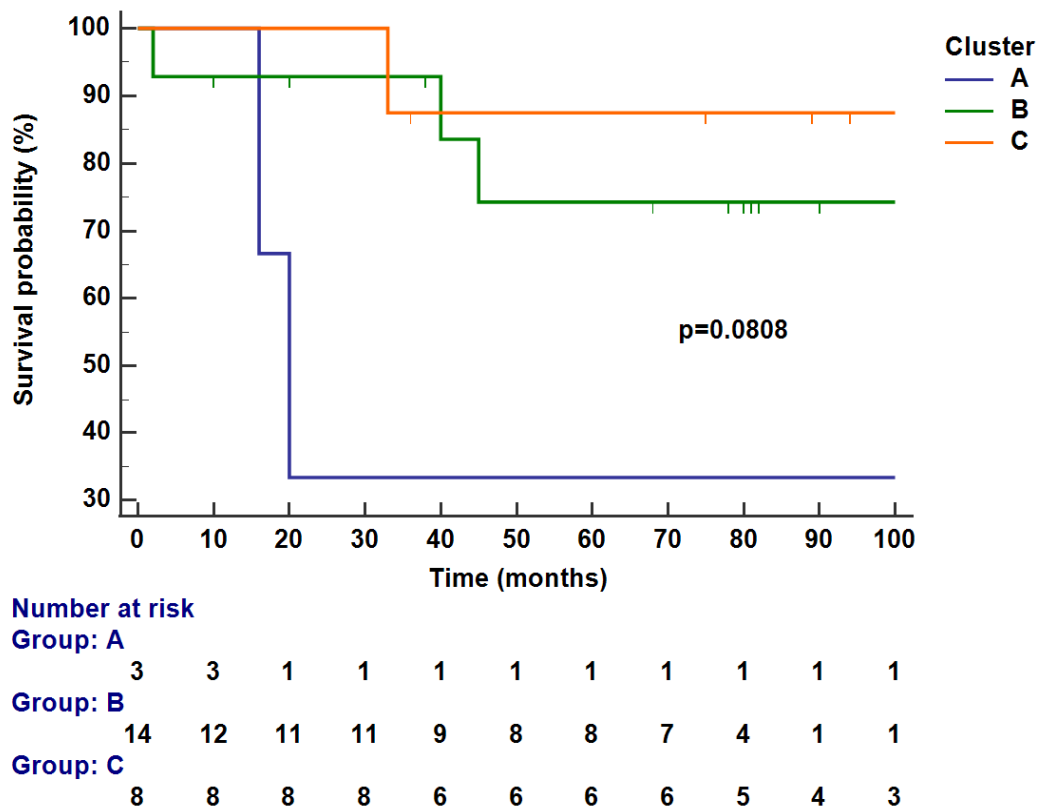

**Figure S1.** Disease-specific survival according to gene expression cluster in 25 PanNETs. Disease-specific survival of patients is not significantly affected by their belonging to a gene expression cluster ( $p = 0.0808$ ), although tumor grade might be a confounding factor. Cluster A includes only G3 tumors (2 dead of disease). Cluster B includes 6 G2 and 8 G1 cases (3 G2 patients dead of disease). Cluster C includes 12 G1, 1 G2 and 1 G3 cases (1 G3 patient dead of disease). Follow-up time is expressed in months. Kaplan-Meier and log-rank statistics were used to determine levels of significance. Follow-up time was curtailed at 100 months, when the total number of patients at risk was 5 (20%) and thus no longer informative.
